# Supplementary material
Source: publisher figshare collection journal article supplement (https://sage.figshare.com/ndownloader/files/14464451)
Supplement: Supplementary file 1 [file 14464451]

## Supplementary Material

### A general guide for the optimization of enzyme assay conditions using the design of experiments approach

by

Favour Chinyere Onyeogaziri and Christos Papaneophytou \*

Department of Life and Health Sciences, School of Sciences and Engineering, University of Nicosia, 46 Makedonitissas Ave., 1700, Nicosia, Cyprus

\*Correspondence: Christos Papaneophytou, Department of Life and Health Sciences, School of Sciences and Engineering, University of Nicosia, Nicosia, Cyprus email: [papaneophytou.c@unic.ac.cy](mailto:papaneophytou.c@unic.ac.cy); Tel: +357 22 841941

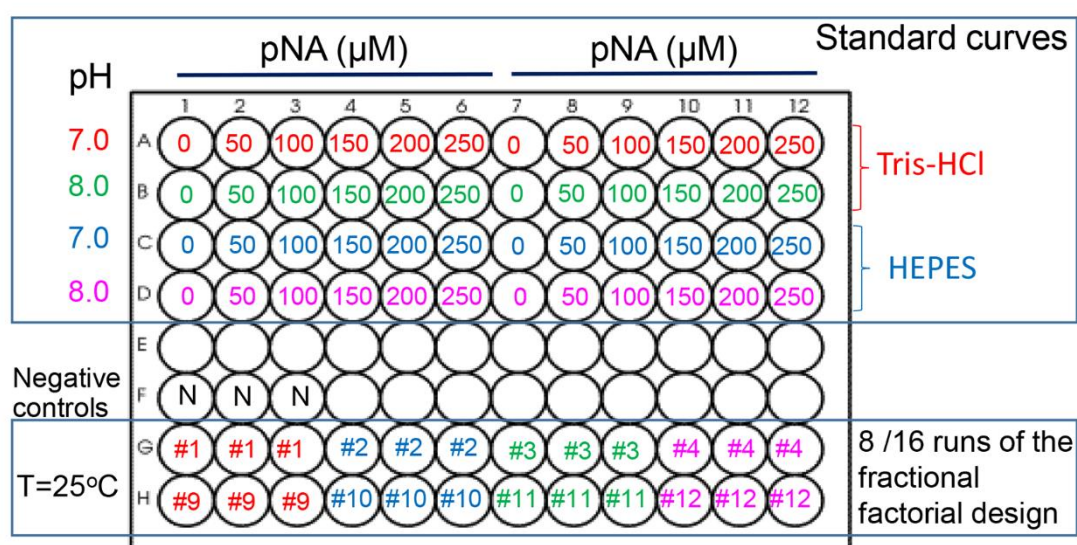

**Supplementary Figure S1:** Example of pipetting scheme for assessment of HRV-3C protease activity under various reaction conditions with a triplicate reaction for each sample. A different pNA standard curve was developed for each of the various buffers that were tested. Note that the different buffers are color-coded.

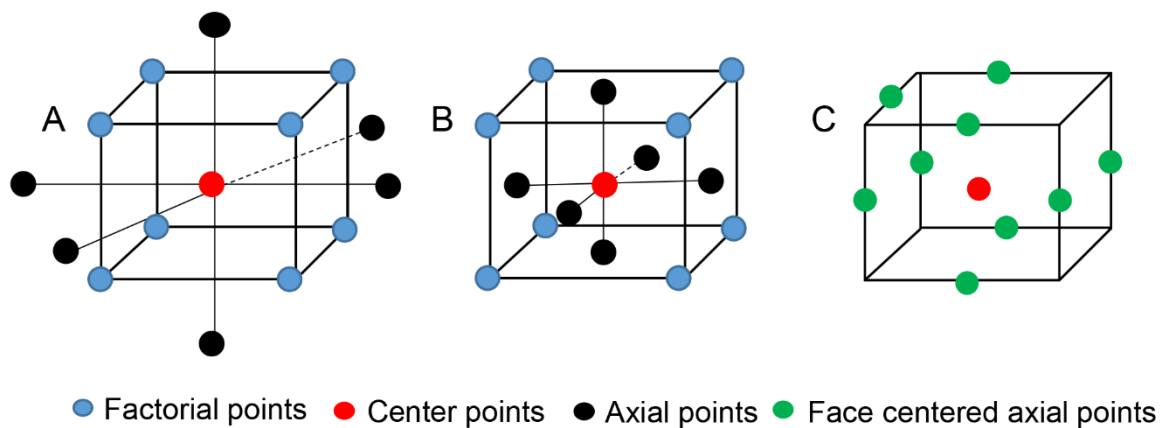

**Supplementary Figure S2:** Graphic representations of central composite design (CCD) (A), face-centered CCD (B) and Box-Behnken design (C). When an axial distance of 1.0 is chosen then the CCD has only 3 levels per factor and is called the Face-Centered Design.

**Supplementary Table S1** Vocabulary of DoE

| Term                 | Description                                                                                      |
|----------------------|--------------------------------------------------------------------------------------------------|
| Experimental Design  | A set of experiments composed of a matrix of different level combinations of the factors studied |
| Factor               | One of the tested (independent) variable that can be set to desire value                         |
| Categorical factor   | A factor with non-numerical (e.g., buffer composition could be either PBS or TBS)                |
| Continuous factors   | A factor with numerical values (e.g., DTT concentration could be either 5 or 10 mM)              |
| Level                | The value (numerical or qualitative “label”) of a factor                                         |
| Run                  | An experiment under specific reaction conditions                                                 |
| Response             | The numerical result of an experiment                                                            |
| Full factorial       | All possible combinations of variables                                                           |
| Fractional factorial | Only a fraction of the full factorial design is carried out.                                     |

**Supplementary Table S2** Essential terms that must be consider in analysis of variance

| Term                  | Description                                                                                                                                                                                                                        |
|-----------------------|------------------------------------------------------------------------------------------------------------------------------------------------------------------------------------------------------------------------------------|
| Model F Value         | It compares the variance of a term with residual (error) variance. If the variances are close to the same, the ratio will be close to one and the term does not have a significant effect on the response (the higher the better). |
| Model <i>p</i> -value | It should be significant and $< 0.05$ to be strongly significant. When the model <i>p</i> -value is between 0.05 and 0.10 is slightly significant                                                                                  |
| Term <i>p</i> -values | Each of the terms should have a <i>p</i> -value $< 0.05$ to be significant. Sometimes insignificant terms (factors) are excluded from the model.                                                                                   |
| R-squared values      | The most important are the “adjusted” and “predicted” R-squared values. Usually, an R-squared value above 0.6 is required                                                                                                          |
| Adequate Precision    | It is the signal to noise ratio and it should be $>4$ . It compares the range of the predicted values at the design points to the average prediction error                                                                         |
| Lack of fit           | It should be insignificant ( $p>0.05$ ). A significant lack of fit means that the design points are not fitted well to the polynomial model                                                                                        |

**Supplementary Table S3** ANOVA results for response surface quadratic model for HRV-3C protease activity

| Source             | Sum of Squares           | df | Mean Square           | F Value                | P value* |                 |
|--------------------|--------------------------|----|-----------------------|------------------------|----------|-----------------|
| Model              | 3.122005×10 <sup>5</sup> | 14 | 22297.90              | 16.15                  | < 0.0001 | Significant     |
| A (pH)             | 38203.10                 | 1  | 38203.10              | 27.67                  | < 0.0001 | Significant     |
| B (Time, min)      | 17421.12                 | 1  | 17421.12              | 12.62                  | 0.0029   | Significant     |
| C (DTT, mM)        | 55978.99                 | 1  | 55978.99              | 40.54                  | < 0.0001 | Significant     |
| D (Glycerol, %v/v) | 2283.66                  | 1  | 2283.66               | 1.65                   | 0.2179   | Not significant |
| AB                 | 154.68                   | 1  | 154.68                | 0.11                   | 0.7425   | Not significant |
| AC                 | 7.69                     | 1  | 7.69                  | 5.566×10 <sup>-3</sup> | 0.9415   | Not significant |
| AD                 | 0.72                     | 1  | 0.72                  | 5.18710 <sup>-4</sup>  | 0.9821   | Not significant |
| BC                 | 2239.64                  | 1  | 2239.64               | 1.62                   | 0.2222   | Not significant |
| BD                 | 8156.97                  | 1  | 8156.97               | 5.91                   | 0.0281   | Significant     |
| CD                 | 465.97                   | 1  | 465.97                | 0.34                   | 0.5699   | Not Significant |
| A <sup>2</sup>     | 27083.87                 | 1  | 27083.87              | 19.61                  | 0.0005   | Significant     |
| B <sup>2</sup>     | 2271.62                  | 1  | 2271.62               | 1.65                   | 0.2191   | Not significant |
| C <sup>2</sup>     | 1.432005×10 <sup>5</sup> | 1  | 1.432×10 <sup>5</sup> | 103.70                 | < 0.0001 | Significant     |
| D <sup>2</sup>     | 34259.56                 | 1  | 34259.56              | 24.81                  | 0.0002   | Significant     |
| Residual           | 20711.99                 | 15 | 1380.80               |                        |          |                 |
| Lack of Fit        | 17209.33                 | 10 | 1720.93               | 2.46                   | 0.1666   | Not significant |

\**p* value: *p*<0.05 is considered as significant

R<sup>2</sup>= 0.9378; Adj R<sup>2</sup>=0.8797 ; Pred R<sup>2</sup>=0.6871; Adeq Precision= 18.111
